# Supplementary material
Source: publisher site journal article supplement (https://www.spandidos-publications.com/2244/downloadSupplementary)

Figure S1. Differences in mRNA expression levels of *UBR1*, *ATG16L1* and *IL-1 $\beta$*  based on various factors. Differences in mRNA expression levels of *UBR1*, *ATG16L1* and *IL-1 $\beta$*  between the patients in the two groups based on (A) sex, (B) type of achalasia and (C) smoking status. (D) Correlation coefficients between mRNA expression levels and the duration of disease were calculated. *UBR1*, E3 ubiquitin-protein ligase component n-recognition 1; *ATG16L1*, autophagy-related 16-like 1; *IL-1 $\beta$* , interleukin-1 $\beta$ .

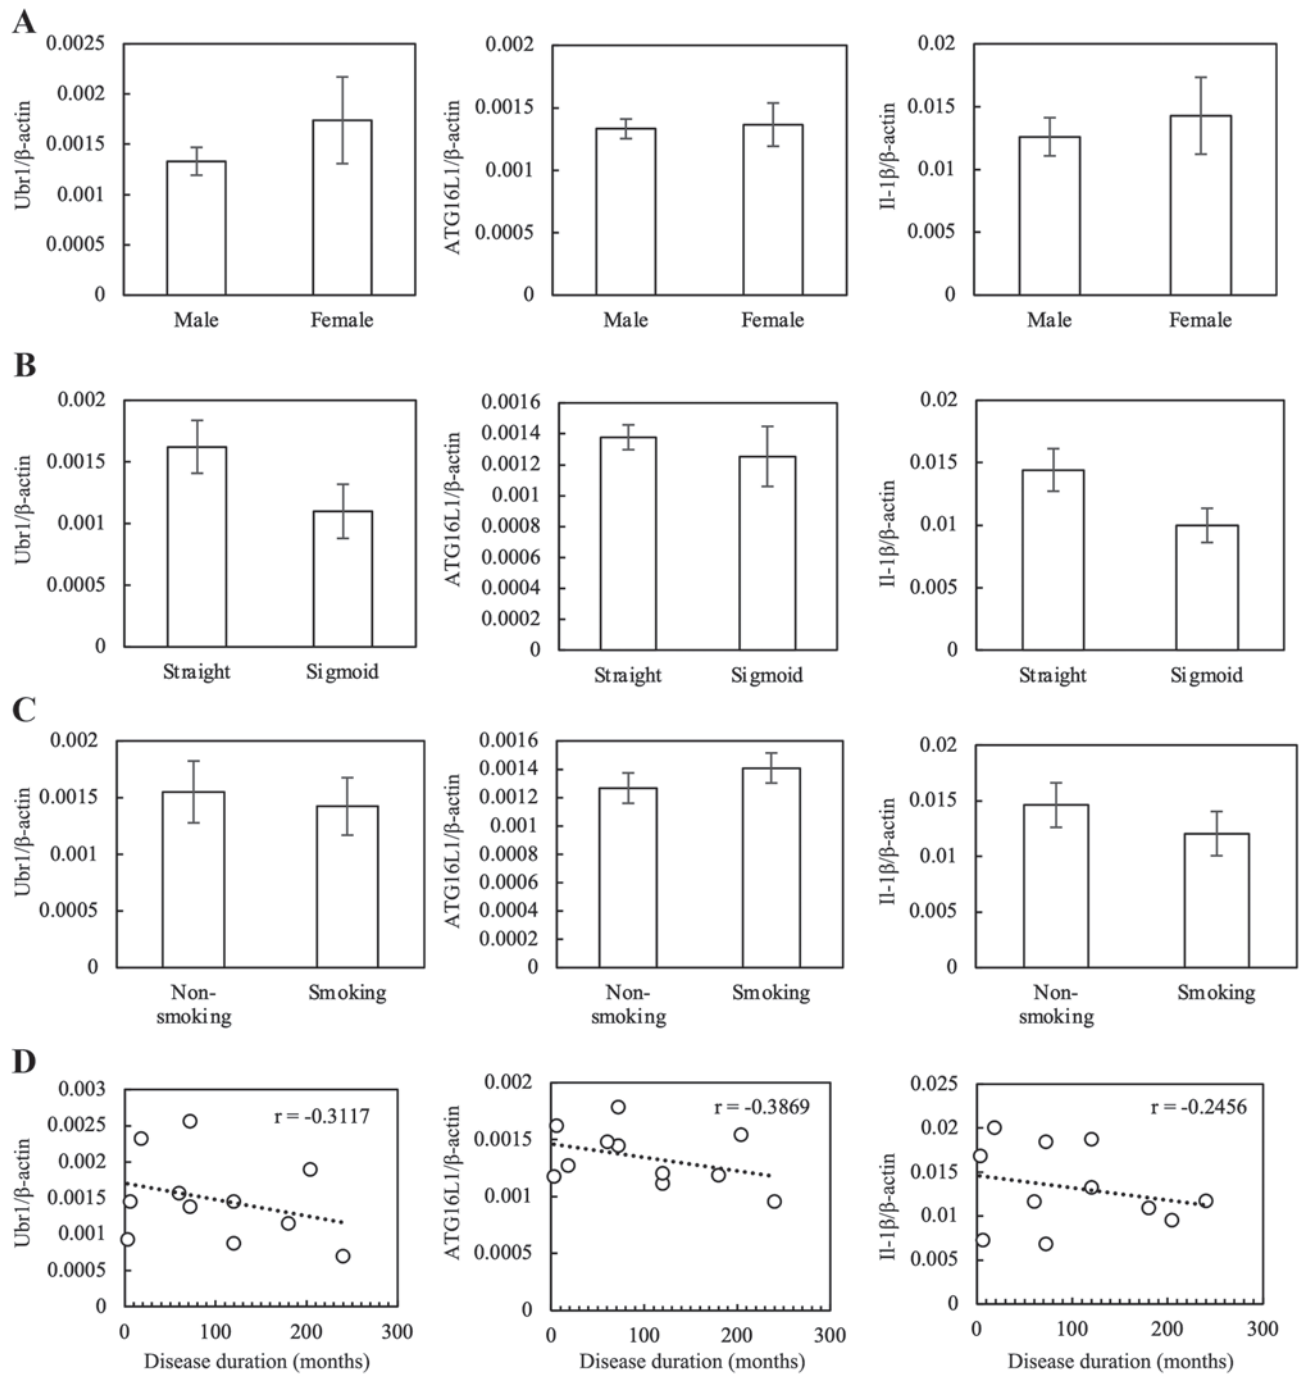

Supplement: Supplementary file 1 [file downloadSupplementary]
